# Supplementary material for: Lineage specific transcription factor waves reprogram neuroblastoma from self-renewal to differentiation
Source: PubMed Central journal article supplement (PMC11039666; doi:10.1038/s41467-024-47166-y), 2024-04-23
Supplement: 41467_2024_47166_MOESM3_ESM.pdf [file 41467_2024_47166_MOESM3_ESM.pdf]

## Description of Additional Supplementary Files

### **Supplementary Dataset 1:**

Temporal patterns of SE changes and identified 1199 SEs in KCNR cells under self-renewal and differentiating conditions. Signal is reported as the reads per million of H3K27ac ChIP-seq signal.

### **Supplementary Dataset 2:**

Overlap of GWAS SNPs with super enhancers (tab 1), all neuroblastoma SNPs reported in McDaniel, L. D. *et al.* Common variants upstream of MLF1 at 3q25 and within CPZ at 4p16 associated with neuroblastoma. *PLoS genetics* **13**, e1006787 (2017), tab 2. Tab 3 contains the bed coordinates for all super enhancers in KCNR cells used for the overlap with GWAS coordinates.

### **Supplementary Dataset 3:**

Each tab is for a different super enhancer cluster (Lost, 1<sup>st</sup> wave, 2<sup>nd</sup> wave and 3<sup>rd</sup> wave). Data shown are for H3K27ac ChIP-seq signal over a time course of ATRA treatment, alongside average gene expression levels over the same ATRA treatment from RNA-seq of SE-associated genes. The Pearson Correlation is additionally calculated between SE signal and gene expression.

### **Supplementary Dataset 4:**

HOMER motif analysis results for transcription factor motifs enriched in SOX4 CUT&RUN peaks. Known motifs are reported, alongside statistical significance and the number and percentages of target sequences with the motif, and the occurrence of the motif in background sequences.

### **Supplementary Dataset 5:**

The coordinates of SOX4 peaks increased upon ATRA treatment (1st tab), and a list of associated genes increased near SOX4 gained peaks (2nd tab).

### **Supplementary Dataset 6:**

List of genes near SOX11 binding sites that decreased in expression after ATRA treatment in both KCNR and LAN5 cells.

### **Supplementary Dataset 7:**

Individual neuroblastoma cell line data for the SOX11 Gene Effect (Chronos) CRISPR (DepMap 21Q3) and the gene expression of *SOX11* log<sub>2</sub>(TPM+1) from the DepMap project. MYCN amplification status is added for each cell line.

### **Supplementary Dataset 8:**

Ingenuity Pathway Analysis of siSOX11 RNA seq data, indicating categories and their significance, and a list of the genes in each pathway, and the predicted activation.

### **Supplementary Dataset 9:**

A list of the number of cell line tumor types in the DepMap analysis, related to Figure 7a.
